# Supplementary material for: Co-Expression of JcNAC1- and JcZFP8-Improved Agronomic Traits of Tobacco and Enhanced Drought Resistance through NbbHLH1 and NbbHLH2
Source: MDPI journal article supplement (doi:10.3390/plants12173029), 2023-08-23
Supplement: s1 [file s1]

## Supplementary materials

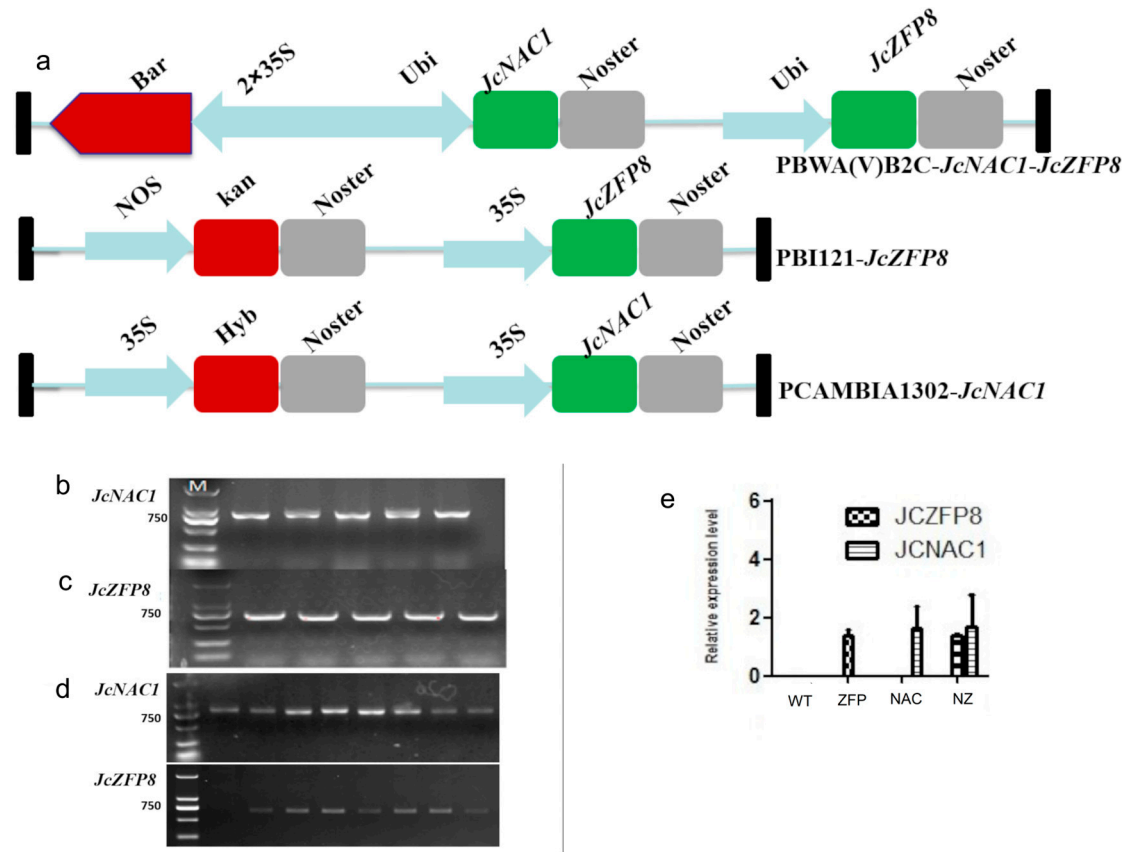

Figure S1 Construction of overexpressed plants a Map of genes overexpression vector; b Verification analysis of PCAM1302-*JcNAC1* transgenic tobacco; c verification analysis of PBI121-*JcZFP8* transgenic tobacco; d verification analysis of *JcNAC1*-*JcZFP8* double transgenic tobacco; e Genes expression level detection of transgenic tobacco M: 2000 Maker, other electrophoresis lanes represent different independent transformations lines, values are means  $\pm$  SEM.

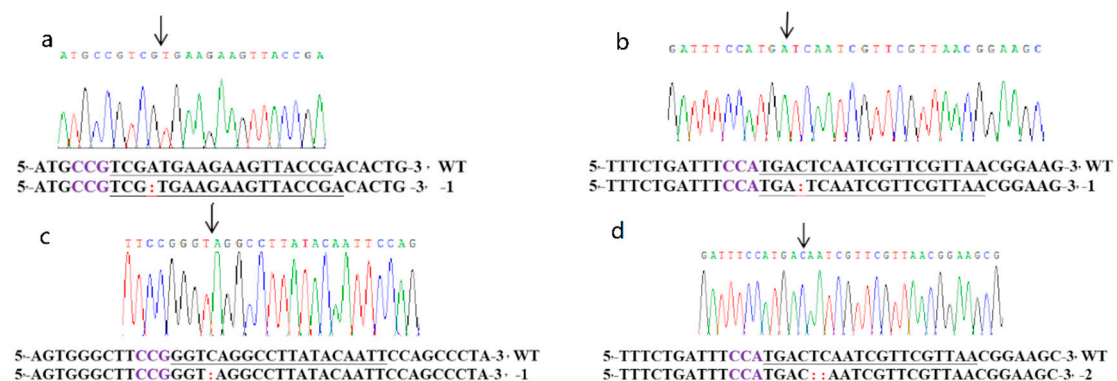

Figure S2 Sequence analysis of *NbbHLH1* and *NbbHLH2* gene knockout tobacco

a *bhlh1*; b *bhlh2*; c and d *bhlh1bhlh2*, The “—” indicating deletion of the given number of nucleotides. Deleted bases are marked with colon

Table S1 Primers used in this study

|                           |                    |                              |
|---------------------------|--------------------|------------------------------|
| Construction<br>of vector | <i>JcZFP8-F</i>    | CGGGATCCATGGATAAGAGCGAAAGAG  |
|                           | <i>JcZFP8-R</i>    | CGAGCTCCTAAACTCACATGGTCTTG   |
|                           | <i>JcNAC1-F</i>    | CGGGATCCATGGCAGCAGCGGCGGCGT  |
|                           | <i>JcNAC1-R</i>    | CCCAAGCTTTCAGAACGGCTTCTGTAGG |
| qRT-PCR                   | <i>JcZFP8-F</i>    | ATGGATAAGAGCGAAAGAG          |
|                           | <i>JcZFP8-R</i>    | CAGATGAAGATCTAAACTCACA       |
|                           | <i>JcNAC1-F</i>    | ATGGCAGCAGCGGCGGCGTTAG       |
|                           | <i>JcNAC1-R</i>    | GAACGGCTTCTGTAGGTACA         |
|                           | <i>NbPYL1-F</i>    | CAGGGTTGACACCAGAA            |
|                           | <i>NbPYL1-R</i>    | TGTGCGAGTAGGGAAGA            |
|                           | <i>NbNbABI2-F</i>  | CCCACTATCCAAGCACC            |
|                           | <i>NbNbABI2-R</i>  | TTGTACCACGAGCCAGA            |
|                           | <i>NbSNRK2E-F</i>  | TTGCCACCGAGACTTGA            |
|                           | <i>NbSNRK2E-R</i>  | CTGCGAATGTAACACTGAGGA        |
|                           | <i>NbSNRK2.7-F</i> | GATTTGGGTTCTGGTAA            |
|                           | <i>NbSNRK2.7-R</i> | CAGTGGACTTGGGTTGA            |
|                           | <i>NbSNRK2.4-F</i> | GATTTGGGTTCTGGTAA            |
|                           | <i>NbSNRK2.4-R</i> | CAGTGGACTTGGGTTGA            |
|                           | <i>NbJAR1-F</i>    | GGTACGGCTTGATTCTCTG          |
|                           | <i>NbJAR1-R</i>    | TACTCCAACCCATCCTTC           |
|                           | <i>NbCOI1-F</i>    | TGTGCTATACGGCGAAAC           |
|                           | <i>NbCOI1-R</i>    | CCGAATCCCTAACAATCA           |
|                           | <i>NbJAZ-F</i>     | TCTGAGCCTTCAACACCA           |
|                           | <i>NbJAZ-R</i>     | GACGCCGTTTCTTCTTCT           |
|                           | <i>NbMYC2-F</i>    | CTCAGAGGCAGCACAATC           |
|                           | <i>NbMYC2-R</i>    | CAGCACCTGTAATCCAAA           |
|                           | <i>NbJA3-F</i>     | TCGGTGACGGGAACTG             |
|                           | <i>NbJA3-R</i>     | CACGACGGACGATTGC             |
|                           | <i>NbBRI1-F</i>    | AACCACCAGTTCCTACCT           |
|                           | <i>NbBRI1-R</i>    | TTTGGCGGATTCTTTAC            |
|                           | <i>NbBSK-F</i>     | TGGACGATGAGGTTGAG            |
|                           | <i>NbBSK-R</i>     | TCTGGAGGAGTGAAAGC            |
|                           | <i>NbBZR-F</i>     | TATCGCAAGGGAAACAGG           |
|                           | <i>NbBZR-R</i>     | TATGGAGAAAGGGCAGGA           |
|                           | <i>NbCYCD3-F</i>   | ATCGCAAGGGAAACAGG            |
|                           | <i>NbCYCD3-R</i>   | ATGGAGAAAGGGCAGGA            |
|                           | <i>NbNAC1-F</i>    | ATCGCAAGGGAAACAGG            |
|                           | <i>NbNAC1-R</i>    | ATGGAGAAAGGGCAGGA            |
|                           | <i>NbNAC29-F</i>   | GCTGCTGTTTCAGGTTAT           |
|                           | <i>NbNAC29-R</i>   | GAGCCACTTTGCTTGTTA           |
|                           | <i>NbNAC25-F</i>   | TCCTCTTCCCGTTGCTAT           |

|                           |                      |                                                 |
|---------------------------|----------------------|-------------------------------------------------|
|                           | <i>NbNAC25-R</i>     | TCCTATCCCTTGGACTGA                              |
|                           | <i>NbMYB21-F</i>     | TGGATGCCAAGGTTAGTC                              |
|                           | <i>NbMYB21-R</i>     | GGTAGCGGCTGTTGATTT                              |
|                           | <i>NbMYB86-F</i>     | TCCGCCTCTTAGGTTGT                               |
|                           | <i>NbMYB86-R</i>     | GGATTCATTGCCGAGTG                               |
|                           | <i>NbMYB44-F</i>     | TCAACGGAGTGATGTAGC                              |
|                           | <i>NbMYB44-R</i>     | CTGGTGAGGCACTAATCT                              |
|                           | <i>NbZFP8-F</i>      | TCAACGGAGTGATGTAGC                              |
|                           | <i>NbZFP8--R</i>     | CTGGTGAGGCACTAATCT                              |
|                           | <i>NbZFP4-F</i>      | TGCCGAGGTGATGGAACA                              |
|                           | <i>NbZFP4-R</i>      | CCCAAAGCCTGCGAACTA                              |
|                           | <i>NbZFP1-F</i>      | CCGTGAGAAAGGTAATG                               |
|                           | <i>NbZFP1-R</i>      | GTCCTCCTAATGCTTGT                               |
|                           | <i>NbERF3-F</i>      | GACCCGTTTATTGACCC                               |
|                           | <i>NbERF3-R</i>      | AACAACAGAAGACGAGGAG                             |
|                           | <i>NbERF5-F</i>      | GAGAAGTGGAGGGTGAAA                              |
|                           | <i>NbERF5-R</i>      | AATGGTGACAAAGGTGGC                              |
|                           | <i>NbDREB2a-F</i>    | CAAAGTGGTGGTGCTAT                               |
|                           | <i>NbDREB2a-R</i>    | GATGCCTTAGATGTGGA                               |
|                           | <i>NbABF-F</i>       | TCGGATTATGGAGTTGCT                              |
|                           | <i>NbABF-R</i>       | AGACTGTCGTTGTGGGTG                              |
|                           | <i>NbWRKY40-F</i>    | TTTGCTCCTACCTGCCTCG                             |
|                           | <i>NbWRKY40-R</i>    | TTGGGTTCTGTGCTGTTGA                             |
|                           | <i>NbWRKY2-F</i>     | GCTGGATTTCACCCTAA                               |
|                           | <i>NbWRKY2-R</i>     | TTGCTGATAAACCGATG                               |
|                           | <i>NbWRKY41-F</i>    | TGCTCCTTATTCCCTCCTC                             |
|                           | <i>NbWRKY41-R</i>    | TGGCGATTCAGACCTTCC                              |
|                           | <i>NbSbHLH1-F</i>    | CATGACCCCATCGTTTGTTAAC                          |
|                           | <i>NbSbHLH1-R</i>    | TTGTCTGAAGCCCGAATCC                             |
|                           | <i>NbSbHLH2-F</i>    | TGCCGTAGACCCATTAACATC                           |
|                           | <i>NbSbHLH2-R</i>    | CCCCGTCGATTAAAGTCTGAAG                          |
| Construction<br>of vector | <i>NbbHLH1A1-BsF</i> | ATATATGGTCTCGATTGTCTGGTAACTTCTT<br>CATCGAGTT    |
|                           | <i>NbbHLH1A1-F0</i>  | TGTCGGTAACTTCTTCATCGAGTTTGTAGA<br>GCTAGAAATAGC  |
|                           | <i>NbbHLH1B1-R0</i>  | AACGGTCAGGCCTTATACAATTCAATCTC<br>TTAGTCGACTCTAC |
|                           | <i>NbbHLH1B1-BsR</i> | ATTATTGGTCTCGAAACGGTCAGGCCTTA<br>TACAATTCAA     |
|                           | <i>NbbHLH2A2-BsF</i> | ATATATGGTCTCGATTGTTAACGAACGATT<br>GAGTCAGTT     |
|                           | <i>NbbHLH2A2-F0</i>  | TGTTAACGAACGATTGAGTCAGTTTGTAGA<br>GCTAGAAATAGC  |

|                       |                                                 |
|-----------------------|-------------------------------------------------|
| <i>NbbHLH2B2</i> -R0  | AACGAAATTAAACAATTCAGCTCAATCTC<br>TTAGTCGACTCTAC |
| <i>NbbHLH2B2</i> -BsR | ATTATTGGTCTCGAAACGAAATTAAACAA<br>TTCAGCTCAA     |
| <i>NbbHLH2A2</i> -BsF | ATATATGGTCTCGATTGTTAACGAACGATT<br>GAGTCAGTT     |
| <i>NbbHLH2A2</i> -F0  | TGTTAACGAACGATTGAGTCAGTTTTAGA<br>GCTAGAAATAGC   |
| <i>NbbHLH1B1</i> -R0  | AACGGTCAGGCCTTATACAATTCAATCTC<br>TTAGTCGACTCTAC |
| <i>NbbHLH1B1</i> -BsR | ATTATTGGTCTCGAAACGGTCAGGCCTTA<br>TACAATTCAA     |

---
